# Supplementary material for: Identification of Diagnostic Biomarkers and Subtypes of Liver Hepatocellular Carcinoma by Multi-Omics Data Analysis
Source: Genes (Basel). 2020 Sep 6;11(9):1051. doi: 10.3390/genes11091051 (PMC7566011; doi:10.3390/genes11091051)
Supplement: Supplementary file 1 [file genes-11-01051-s001.pdf]

## Supplementary Figures and Tables

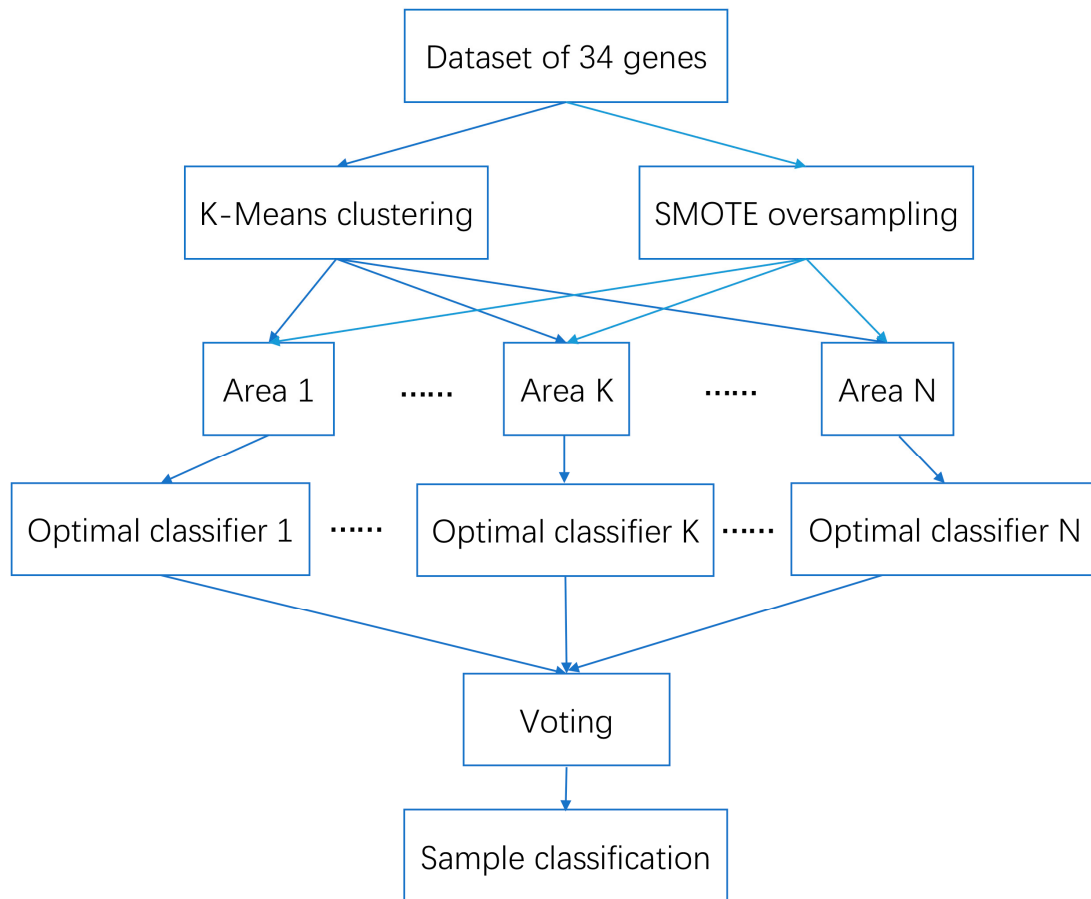

**Figure S1.** The flowchart regarding the classification of the samples. The detailed operating procedures and information about classification of samples.

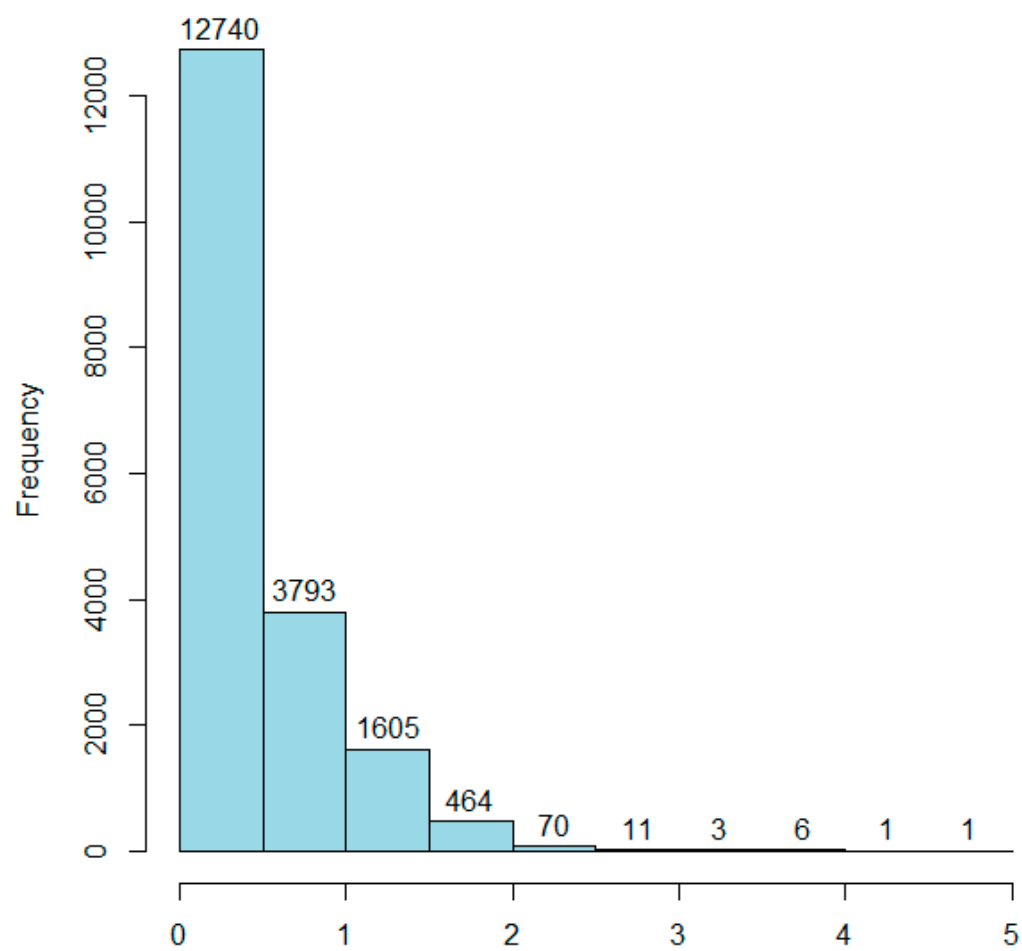

**Figure S2.** The results of the Fisher Ratio. Bar plot presented the interval of genes' fisher ratio and the number of genes in each interval.

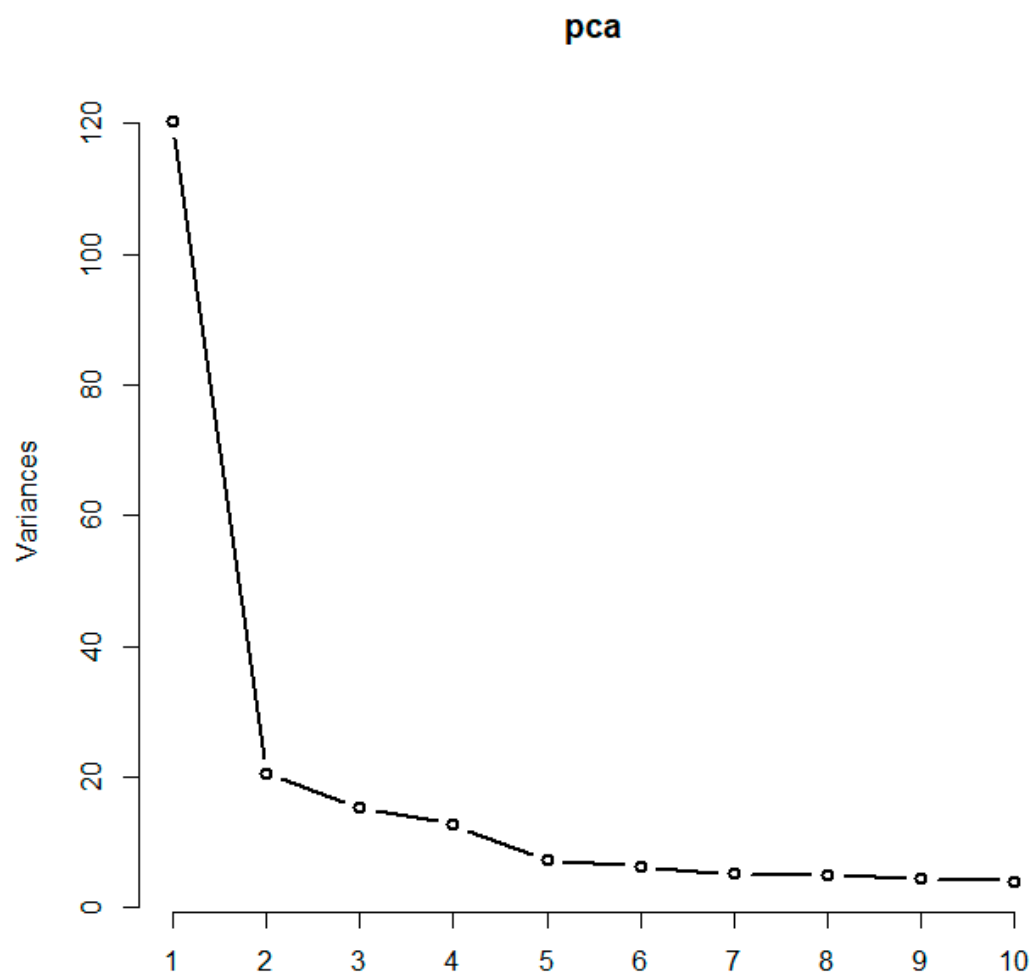

**Figure S3.** Screen plot of 300 representative genes. Scree plot was drawn to show the correlation between variance and the number of main components.

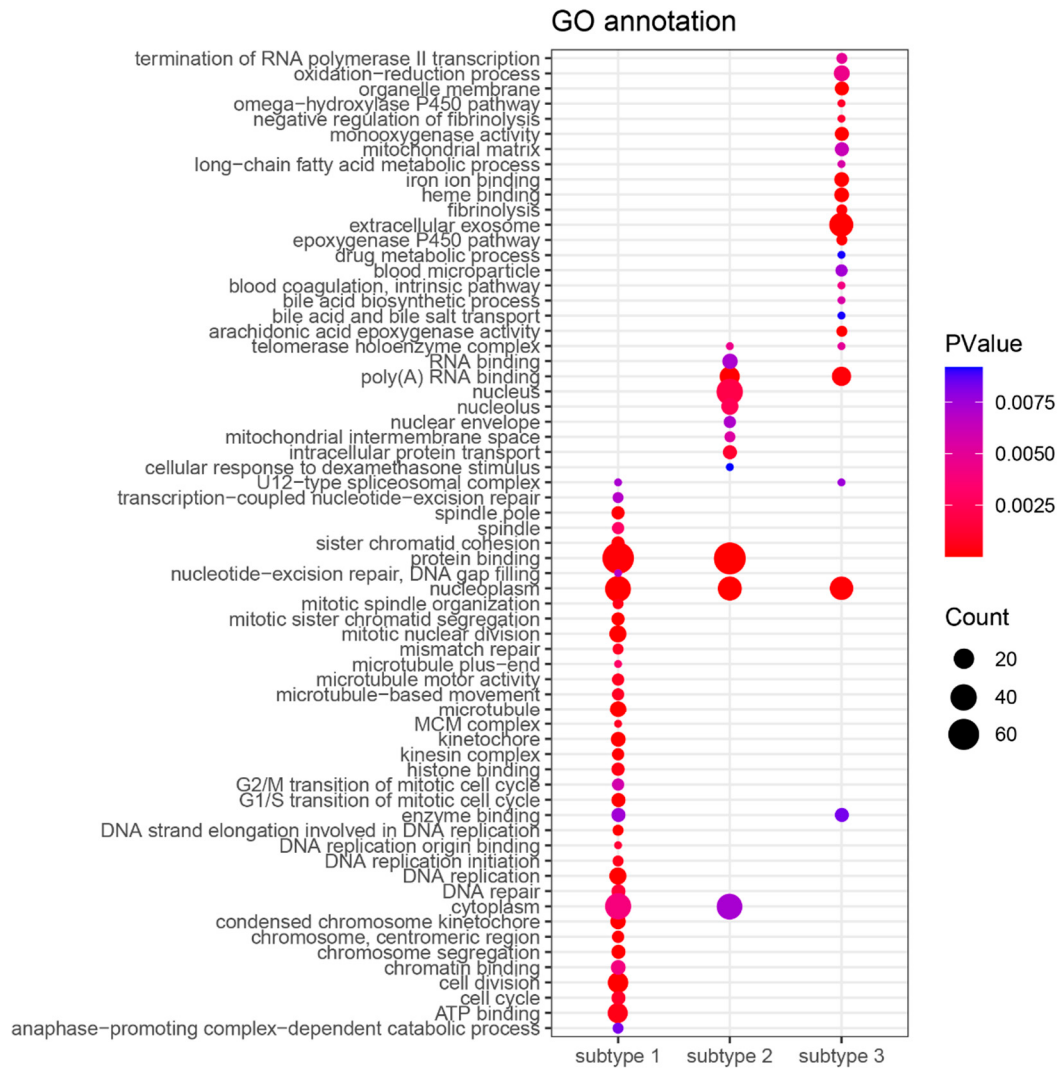

**Figure S4.** The bubble diagram of functional enrichment. The enriched Gene Ontology for subtype 1, subtype 2 and subtype 3. Count means the number of genes enriched in a certain annotation.

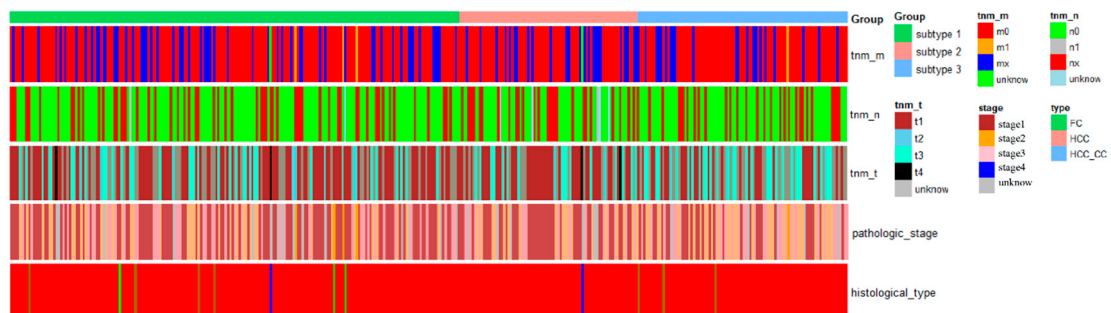

**Figure S5.** The heatmap for the molecular subtypes, pathologic stage and TNM staging. Tnm\_m, tnm\_n and tnm\_t were the TNM staging.

**Table S1.** The detailed information for the 34 DEGs.

| Gene Symbol    | Description                                                                | Reference               | p-Value                    | Fold Change |
|----------------|----------------------------------------------------------------------------|-------------------------|----------------------------|-------------|
| <i>GABRD</i>   | stage-specific differentially expressed in hepatocellular carcinoma        | [38]                    | $3.368509 \times 10^{-62}$ | 34.8256     |
| <i>ANGPTL6</i> | highly expressed in liver cancer                                           | [43]                    | $1.338193 \times 10^{-23}$ | 0.1879      |
| <i>MSTO1</i>   | Required for mitochondrial fusion and mitochondrial network formation      | GeneCards               | $2.034419 \times 10^{-94}$ | 5.1055      |
| <i>EBF2</i>    | A potential therapeutic target of HCC                                      | [40]                    | $3.463284 \times 10^{-49}$ | 56.8254     |
| <i>GBA</i>     | inhibit liver cancer                                                       | [45]                    | $9.070282 \times 10^{-83}$ | 4.0856      |
| <i>CLEC4M</i>  | a valuable biomarker for the prognosis of the patients with HCC            | [30]                    | $2.854162 \times 10^{-14}$ | 0.0273      |
| <i>MIR3658</i> | involved in tumor progression of bladder cancer                            | [52]                    | $4.156083 \times 10^{-68}$ | 5.0915      |
| <i>GPAA1</i>   | a therapeutic target for gastric cancer                                    | [51]                    | $1.874503 \times 10^{-70}$ | 4.0789      |
| <i>CACYBP</i>  | highly expressed and associated with poor prognosis in HCC                 | [33]                    | $6.909608 \times 10^{-69}$ | 3.3634      |
| <i>SFTA1P</i>  | significant association with overall survival in HCC patients              | [32]                    | $3.449638 \times 10^{-48}$ | 123.5817    |
| <i>CXCL14</i>  | linked with impaired liver function                                        | [49]                    | $5.819188 \times 10^{-20}$ | 0.1507      |
| <i>CKS1B</i>   | represented a potential research target for therapeutics of retinoblastoma | [46]                    | $9.562192 \times 10^{-68}$ | 3.7726      |
| <i>APLN</i>    | played an oncogenic role in HCC                                            | [35]                    | $1.226416 \times 10^{-42}$ | 24.4214     |
| <i>KRTCAP2</i> | The gene is overexpressed in Liver                                         | GeneCards               | $8.404593 \times 10^{-88}$ | 3.4930      |
| <i>ESM1</i>    | serve as a biomarker for diagnosing and monitoring renal cell carcinoma    | [50]                    | $1.897959 \times 10^{-37}$ | 29.5066     |
| <i>TBCE</i>    | Low tissue specificity                                                     | The Human Protein Atlas | $2.562632 \times 10^{-92}$ | 3.3832      |
| <i>CLEC1B</i>  | a signature gene highly associated with tumor progression                  | [47]                    | $9.306855 \times 10^{-17}$ | 0.0368      |
| <i>PPOX</i>    | played a crucial role in the development of HCC                            | [41]                    | $8.340677 \times 10^{-97}$ | 3.5038      |
| <i>CDH13</i>   | a potential noninvasive biomarker of HCC                                   | [36]                    | $7.580294 \times 10^{-71}$ | 7.8091      |
| <i>NTF3</i>    | controls survival and differentiation of mammalian neurons                 | GeneCards               | $1.135516 \times 10^{-22}$ | 0.1380      |

|                     |                                                                                           |                         |                            |         |
|---------------------|-------------------------------------------------------------------------------------------|-------------------------|----------------------------|---------|
| <i>C1orf35</i>      | related to pathway Innate Immune System                                                   | GeneCards               | $9.410057 \times 10^{-86}$ | 3.9379  |
| <i>C8orf33</i>      | correlated with overall survival in HCC patients                                          | [37]                    | $5.074940 \times 10^{-74}$ | 3.7787  |
| <i>MIR4793</i>      | involved in post-transcriptional regulation of gene expression in multicellular organisms | GeneCards               | $2.573851 \times 10^{-44}$ | 17.7375 |
| <i>HIGD1B</i>       | links to tumorigenesis and the progression of pituitary adenomas                          | GeneCards               | $1.753135 \times 10^{-79}$ | 13.1410 |
| <i>BLOC1S3</i>      | induce hepatocyte apoptosis                                                               | [44]                    | $1.733118 \times 10^{-74}$ | 3.1598  |
| <i>LOC105369632</i> | an RNA Gene, affiliated with the lncRNA class                                             | GeneCards               | $1.855580 \times 10^{-69}$ | 4.5705  |
| <i>COL15A1</i>      | Prognostic marker in liver cancer (favourable)                                            | The Human Protein Atlas | $9.020337 \times 10^{-41}$ | 21.5720 |
| <i>CRIP3</i>        | Cancer enhanced (liver cancer)                                                            | The Human Protein Atlas | $2.201642 \times 10^{-35}$ | 7.0812  |
| <i>SMYD3</i>        | promoted the tumor igenicity and intrahepatic metastasis of HCC cell                      | [39]                    | $3.849815 \times 10^{-46}$ | 4.5849  |
| <i>DDX11-AS1</i>    | played important role during HCC oncogenesis                                              | [34]                    | $7.968983 \times 10^{-52}$ | 12.1320 |
| <i>CYP2C8</i>       | downregulated in HCC and could be a potential prognostic biomarker                        | [31]                    | $2.130738 \times 10^{-20}$ | 0.2245  |
| <i>CEP72</i>        | the major microtubule-organizing center in animal cells                                   | GeneCards               | $6.352548 \times 10^{-48}$ | 4.2004  |
| <i>HCG25</i>        | an RNA Gene, and is affiliated with the lncRNA class                                      | GeneCards               | $5.731509 \times 10^{-59}$ | 5.1442  |
| <i>FAM83H</i>       | expressed higher in HCC cells compared to normal liver                                    | [48]                    | $1.191638 \times 10^{-63}$ | 4.2419  |

**Table S2.** Function enrichment analysis of the 34 DEGs.

| Function                                              | <i>p-Value</i>         | Genes                                  |
|-------------------------------------------------------|------------------------|----------------------------------------|
| Receptor regulator activity                           | $1.592 \times 10^{-3}$ | <i>NTF3, CXCL14</i>                    |
| Cell development                                      | $1.927 \times 10^{-3}$ | <i>NTF3, TBCE, SMYD3</i>               |
| Positive regulation of response to external stimulus  | $2.429 \times 10^{-3}$ | <i>NTF3, CDH13</i>                     |
| Multicellular organismal process                      | $2.607 \times 10^{-3}$ | <i>NTF3, GBA, ANGPTL6, TBCE, CDH13</i> |
| Muscle structure development                          | $3.298 \times 10^{-3}$ | <i>CXCL14, SMYD3</i>                   |
| Viral genome replication                              | $5.250 \times 10^{-3}$ | <i>CLEC4M</i>                          |
| Membrane lipid catabolic process                      | $5.250 \times 10^{-3}$ | <i>GBA</i>                             |
| Cellular response to glucocorticoid stimulus          | $5.250 \times 10^{-3}$ | <i>SMYD3</i>                           |
| Modulation by virus of host morphology or physiology  | $5.250 \times 10^{-3}$ | <i>CLEC4M</i>                          |
| Protein localization to microtubule organizing center | $5.250 \times 10^{-3}$ | <i>CEP72</i>                           |

|                                                                         |                        |                                      |
|-------------------------------------------------------------------------|------------------------|--------------------------------------|
| Cellular response to dexamethasone stimulus                             | $5.250 \times 10^{-3}$ | <i>SMYD3</i>                         |
| Skin morphogenesis                                                      | $5.250 \times 10^{-3}$ | <i>GBA</i>                           |
| Maintenance of protein localization in endoplasmic reticulum            | $5.250 \times 10^{-3}$ | <i>GPAA1</i>                         |
| Negative regulation of peptidyl-tyrosine phosphorylation                | $5.250 \times 10^{-3}$ | <i>NTF3</i>                          |
| Regulation of locomotion                                                | $5.405 \times 10^{-3}$ | <i>NTF3, CDH13</i>                   |
| regulation of the force of heart contraction                            | $6.122 \times 10^{-3}$ | <i>APLN</i>                          |
| Adhesion of symbiont to host                                            | $6.122 \times 10^{-3}$ | <i>CLEC4M</i>                        |
| Muscle atrophy                                                          | $6.122 \times 10^{-3}$ | <i>TBCE</i>                          |
| Intracellular signal transduction                                       | $6.400 \times 10^{-3}$ | <i>CLEC4M, NTF3, GBA</i>             |
| Anatomical structure development                                        | $6.891 \times 10^{-3}$ | <i>NTF3, COL15A1, CLEC1B, CXCL14</i> |
| Pigment cell differentiation                                            | $6.993 \times 10^{-3}$ | <i>BLOC1S3</i>                       |
| Aromatase activity                                                      | $6.993 \times 10^{-3}$ | <i>CYP2C8</i>                        |
| Oxygen binding                                                          | $6.993 \times 10^{-3}$ | <i>CYP2C8</i>                        |
| GABA receptor activity                                                  | $6.993 \times 10^{-3}$ | <i>GABRD</i>                         |
| Response to testosterone                                                | $6.993 \times 10^{-3}$ | <i>GBA</i>                           |
| Cell activation                                                         | $7.107 \times 10^{-3}$ | <i>CLEC1B, BLOC1S3</i>               |
| Cadherin binding                                                        | $7.864 \times 10^{-3}$ | <i>CDH13</i>                         |
| Axo-dendritic transport                                                 | $7.864 \times 10^{-3}$ | <i>BLOC1S3</i>                       |
| Phosphate-containing compound metabolic process                         | $8.058 \times 10^{-3}$ | <i>NTF3, GBA, GPAA1</i>              |
| Regulation of cyclin-dependent protein serine/threonine kinase activity | $8.734 \times 10^{-3}$ | <i>CKS1B</i>                         |
| Positive regulation of receptor-mediated endocytosis                    | $8.734 \times 10^{-3}$ | <i>NTF3</i>                          |
| Extracellular matrix structural constituent                             | $8.734 \times 10^{-3}$ | <i>COL15A1</i>                       |
| Endocrine hormone secretion                                             | $8.734 \times 10^{-3}$ | <i>APLN</i>                          |
| Developmental process                                                   | $8.799 \times 10^{-3}$ | <i>FAM83H, CLEC1B, EBF2, BLOC1S3</i> |
| Catalytic activity, acting on a protein                                 | $9.024 \times 10^{-3}$ | <i>SMYD3, GPAA1, CKS1B</i>           |
| Positive regulation of transport                                        | $9.557 \times 10^{-3}$ | <i>NTF3, APLN</i>                    |
| Chemokine receptor binding                                              | $9.604 \times 10^{-3}$ | <i>CXCL14</i>                        |
| Porphyrin-containing compound metabolic process                         | $9.604 \times 10^{-3}$ | <i>PPOX</i>                          |

**Table S3.** Pathway enrichment analysis of the 34 DEGs.

| <b>Pathway</b>                                         | <b>P-Value</b>          | <b>Genes</b>                    |
|--------------------------------------------------------|-------------------------|---------------------------------|
| C-type lectin receptor signaling pathway               | $3.9220 \times 10^{-3}$ | <i>CLEC4M, CLEC1B</i>           |
| Other glycan degradation                               | $1.6532 \times 10^{-2}$ | <i>GBA</i>                      |
| Glycosylphosphatidylinositol (GPI)-anchor biosynthesis | $2.2556 \times 10^{-2}$ | <i>GPAA1</i>                    |
| Linoleic acid metabolism                               | $2.5981 \times 10^{-2}$ | <i>CYP2C8</i>                   |
| Nicotine addiction                                     | $3.5343 \times 10^{-2}$ | <i>GABRD</i>                    |
| Neuroactive ligand-receptor interaction                | $3.5760 \times 10^{-2}$ | <i>GABRD, APLN</i>              |
| Metabolic pathways                                     | $3.6029 \times 10^{-2}$ | <i>CYP2C8, GBA, PPOX, GPAA1</i> |
| Porphyrin and chlorophyll metabolism                   | $3.7036 \times 10^{-2}$ | <i>PPOX</i>                     |

|                                                               |                         |                |
|---------------------------------------------------------------|-------------------------|----------------|
| Sphingolipid metabolism                                       | $4.1255 \times 10^{-2}$ | <i>GBA</i>     |
| Arachidonic acid metabolism                                   | $5.4635 \times 10^{-2}$ | <i>CYP2C8</i>  |
| Retinol metabolism                                            | $5.7952 \times 10^{-2}$ | <i>CYP2C8</i>  |
| Drug metabolism - cytochrome P450                             | $6.2082 \times 10^{-2}$ | <i>CYP2C8</i>  |
| Chemical carcinogenesis                                       | $7.0290 \times 10^{-2}$ | <i>CYP2C8</i>  |
| GABAergic synapse                                             | $7.5993 \times 10^{-2}$ | <i>GABRD</i>   |
| Protein digestion and absorption                              | $7.6805 \times 10^{-2}$ | <i>COL15A1</i> |
| Morphine addiction                                            | $7.7617 \times 10^{-2}$ | <i>GABRD</i>   |
| Small cell lung cancer                                        | $7.9237 \times 10^{-2}$ | <i>CKS1B</i>   |
| Viral protein interaction with cytokine and cytokine receptor | $8.4888 \times 10^{-2}$ | <i>CXCL14</i>  |
| Serotonergic synapse                                          | $9.6883 \times 10^{-2}$ | <i>CYP2C8</i>  |
